# Supplementary material for: The impact of SASA!, a community mobilisation intervention, on women's experiences of intimate partner violence: secondary findings from a cluster randomised trial in Kampala, Uganda
Source: PubMed Central journal article supplement — J Epidemiol Community Health. 2016 Feb 12;70(8):818–25. doi: 10.1136/jech-2015-206665 (PMC4975800; doi:10.1136/jech-2015-206665), 2016-02-12
Supplement: jech-2015-206665-s2.pdf [file jech-2015-206665-s2.pdf]

## Appendix 2: Outcome indicators

| Type of abuse/aggression       | Indicator                                   | Respondents (denominator)                                             | Items in composite indices                                                                                                                                                                                                                                                                                                                                                                                                                                                                                                                                                                                                                                                                                                                                                                                                                                                |
|--------------------------------|---------------------------------------------|-----------------------------------------------------------------------|---------------------------------------------------------------------------------------------------------------------------------------------------------------------------------------------------------------------------------------------------------------------------------------------------------------------------------------------------------------------------------------------------------------------------------------------------------------------------------------------------------------------------------------------------------------------------------------------------------------------------------------------------------------------------------------------------------------------------------------------------------------------------------------------------------------------------------------------------------------------------|
| <b>Physical and sexual IPV</b> | Physical IPV overall                        | Women who have had a regular partner/casual partner in the past year  | <p>Reports that her partner/most recent partner has done at least one of the following things to her in the past year:</p> <ul style="list-style-type: none"> <li>• Slapped her or thrown something at her that could hurt her</li> <li>• Pushed her or shoved her or pulled her hair</li> <li>• Hit her with his fist or something else that could hurt her</li> <li>• Kicked her, dragged her or beat her up</li> <li>• Choked or burnt her on purpose</li> <li>• Threatened to use or actually used a gun, knife or other weapon against her</li> <li>• Threatened to use or actually used a panga (stick) against her</li> </ul>                                                                                                                                                                                                                                      |
|                                | Severe or repeat episode(s) of physical IPV | Women who have had a regular partners/casual partner in the past year | <p>Reports that her partner/most recent partner has done at least one of the following things to her in the past year:</p> <ul style="list-style-type: none"> <li>• Hit her with his fist or something else that could hurt her</li> <li>• Kicked her, dragged her or beat her up</li> <li>• Choked or burnt her on purpose</li> <li>• Threatened to use or actually used a gun, knife or other weapon against her</li> <li>• Threatened to use or actually used a panga (stick) against her</li> </ul> <p style="text-align: center;"><i>Or</i></p> <p>Reports that her partner/most recent partner has done either of the following things to her on at least two occasions in the past year:</p> <ul style="list-style-type: none"> <li>• Slapped her or thrown something at her that could hurt her</li> <li>• Pushed her or shoved her or pulled her hair</li> </ul> |
|                                | New onset physical IPV                      | Women with no experience of physical IPV prior to the past year       | As for physical IPV overall                                                                                                                                                                                                                                                                                                                                                                                                                                                                                                                                                                                                                                                                                                                                                                                                                                               |
|                                | Continued physical IPV                      | Women with experience of physical IPV prior to the past year          | As for physical IPV overall                                                                                                                                                                                                                                                                                                                                                                                                                                                                                                                                                                                                                                                                                                                                                                                                                                               |
|                                | Sexual IPV                                  | Women who have had a regular partner/casual partner in the past year  | <p>Reports that her partner/most recent partner has done at least one of the following things to her in the past year:</p> <ul style="list-style-type: none"> <li>• Forced her to have sexual intercourse by physically threatening her, holding her down or hurting her in some way</li> <li>• She had sexual intercourse because she was intimidated by him or afraid he would hurt her</li> </ul>                                                                                                                                                                                                                                                                                                                                                                                                                                                                      |
|                                | New onset sexual IPV                        | Women with no experience of sexual IPV prior to the past year         | As for sexual IPV overall                                                                                                                                                                                                                                                                                                                                                                                                                                                                                                                                                                                                                                                                                                                                                                                                                                                 |
|                                | Continued sexual IPV                        | Women with experience of sexual IPV prior to the past year            | As for sexual IPV overall                                                                                                                                                                                                                                                                                                                                                                                                                                                                                                                                                                                                                                                                                                                                                                                                                                                 |
|                                | Physical and/or sexual IPV                  | Women who have had a regular partner/casual partner in the past year  | <p>Reports that her partner/most recent partner has done at least one of the following things to her in the past year:</p> <ul style="list-style-type: none"> <li>• Slapped her or thrown something at her that could hurt her</li> <li>• Pushed her or shoved her or pulled her hair</li> <li>• Hit her with his fist or something else that could hurt her</li> <li>• Kicked her, dragged her or beat her up</li> <li>• Choked or burnt her on purpose</li> <li>• Threatened to use or actually used a gun, knife or other weapon</li> </ul>                                                                                                                                                                                                                                                                                                                            |

|                               |                                       |                                                                         |                                                                                                                                                                                                                                                                                                                                                                                                                                                                                                                                                                                                     |
|-------------------------------|---------------------------------------|-------------------------------------------------------------------------|-----------------------------------------------------------------------------------------------------------------------------------------------------------------------------------------------------------------------------------------------------------------------------------------------------------------------------------------------------------------------------------------------------------------------------------------------------------------------------------------------------------------------------------------------------------------------------------------------------|
|                               |                                       |                                                                         | <ul style="list-style-type: none"> <li>• against her</li> <li>• Threatened to use or actually used a panga (stick) against her</li> <li>• Forced her to have sexual intercourse by physically threatening her, holding her down or hurting her in some way</li> <li>• She had sexual intercourse because she was intimidated by him or afraid he would hurt her</li> </ul>                                                                                                                                                                                                                          |
|                               | Injury from physical or sexual IPV    | Women who have had a regular partner/casual partner in the past year    | <p>Reports that she has experienced at least one of the following injuries as a result of what her partner has done to her in the past year:</p> <ul style="list-style-type: none"> <li>• Cuts, bruises or aches</li> <li>• Eye injuries, sprains, dislocations, burns, or bleeding</li> <li>• Deep wounds, broken bones, broken teeth or any other serious injury</li> </ul>                                                                                                                                                                                                                       |
|                               | New onset physical and/or sexual IPV  | Women with no experience of physical/sexual IPV prior to the past year  | As for physical and/or sexual IPV overall                                                                                                                                                                                                                                                                                                                                                                                                                                                                                                                                                           |
|                               | Continued physical and/or sexual IPV  | Women with experience of physical/sexual IPV prior to the past year     | As for physical and/or sexual IPV overall                                                                                                                                                                                                                                                                                                                                                                                                                                                                                                                                                           |
| <b>Emotional aggression</b>   | Emotional aggression overall          | Women who have had a regular partner/casual partner in the past year    | <p>Reports that her partner/most recent partner has done at least one of the following things to her in the past year:</p> <ul style="list-style-type: none"> <li>• Belittled or humiliated her in front of other people</li> <li>• Insulted her or made her feel bad about herself</li> <li>• Done things to scare or intimidate her on purpose (e.g. by the way her looked at her, by yelling or smashing things)</li> <li>• Threatened to hurt her or someone she cares about</li> </ul>                                                                                                         |
|                               | High intensity emotional aggression   | Women who have had a regular partners/casual partner in the past year   | <p>Reports that in the past year her partner has done <b>any of the following things to her 'many' times</b></p> <p style="text-align: center;"><i>Or</i></p> <p><b>three or more of these things 'once' or 'a few' times:</b></p> <ul style="list-style-type: none"> <li>• Belittled or humiliated her in front of other people</li> <li>• Insulted her or made her feel bad about herself</li> <li>• Done things to scare or intimidate her on purpose (e.g. by the way her looked at her, by yelling or smashing things)</li> <li>• Threatened to hurt her or someone she cares about</li> </ul> |
|                               | New onset emotional aggression        | Women with no experience of emotional aggression prior to the past year | As for emotional aggression overall                                                                                                                                                                                                                                                                                                                                                                                                                                                                                                                                                                 |
|                               | Continued emotional aggression        | Women with experience of emotional aggression prior to the past year    | As for emotional aggression overall                                                                                                                                                                                                                                                                                                                                                                                                                                                                                                                                                                 |
| <b>Controlling behaviours</b> | Controlling behaviours overall        | Women who have had a regular partner/casual partner in the past year    | <p>Reports that her partner/most recent partner has done at least one of the following things to her in the past year:</p> <ul style="list-style-type: none"> <li>• Become very angry if she talked to other men</li> <li>• Insisted on knowing where she was at all times</li> <li>• Tried to keep her from seeing her friends</li> <li>• Tried to restrict contact with her family of birth</li> <li>• Is often suspicious that she is unfaithful</li> </ul>                                                                                                                                      |
|                               | High intensity controlling behaviours | Women who have had a regular partners/casual partner in the past year   | <p>Reports that in the past year her partner has done <b>any of the following things to her 'many' times</b></p> <p style="text-align: center;"><i>Or</i></p> <p><b>three or more of these things 'once' or 'a few' times:</b></p> <ul style="list-style-type: none"> <li>• Become very angry if she talked to other men</li> <li>• Insisted on knowing where she was at all times</li> <li>• Tried to keep her from seeing her friends</li> <li>• Tried to restrict contact with her family of birth</li> <li>• Is often suspicious that she is unfaithful</li> </ul>                              |

|                        |                                  |                                                                           |                                                                                                                                                |
|------------------------|----------------------------------|---------------------------------------------------------------------------|------------------------------------------------------------------------------------------------------------------------------------------------|
|                        | New onset controlling behaviours | Women with no experience of controlling behaviours prior to the past year | As for controlling behaviours overall                                                                                                          |
|                        | Continued controlling behaviours | Women with experience of controlling behaviours prior to the past year    | As for controlling behaviours overall                                                                                                          |
| <b>Fear of partner</b> | Fear of partner overall          | Women who have had a regular partner/casual partner in the past year      | Reports having 'lived in fear of her partner/most recent partner or any other partner' sometimes, often or all the time in the past 12 months. |
|                        | New onset fear of partner        | Women who experienced no fear of partner prior to the past year           | As for fear of partner overall                                                                                                                 |
|                        | Continued fear of partner        | Women who experienced fear of partner prior to the past year              | As for fear of partner overall                                                                                                                 |
